# Supplementary material
Source: PubMed Central journal article supplement (PMC2745826)
Supplement: jm9006966_si_001.pdf [file jm9006966_si_001.pdf]

Supporting information for  
Automated high-throughput docking: a feasibility study

By John J. Irwin\*, Brian K. Shoichet, Michael M. Mysinger, Niu Huang, Francesco Colizzi, Pascal Wassam  
and Yiqun Cao

Department of Pharmaceutical Chemistry, Byers Hall, Box 2550, University of California San Francisco, San  
Francisco CA 94158-2330

**Figure S1.** Histogram and cumulative frequency of cases of good pose fidelity ( $\text{\AA}$ , RMSD) as a function of pose fidelity, for each parameter set. Astex-85 benchmark.

**Figure S2.** Plot of pose fidelity ( $\text{\AA}$ , RMSD) vs % rank compared to about 100 property matched decoys (log scale). For Astex-85, for each parameter set separately.

**1.A**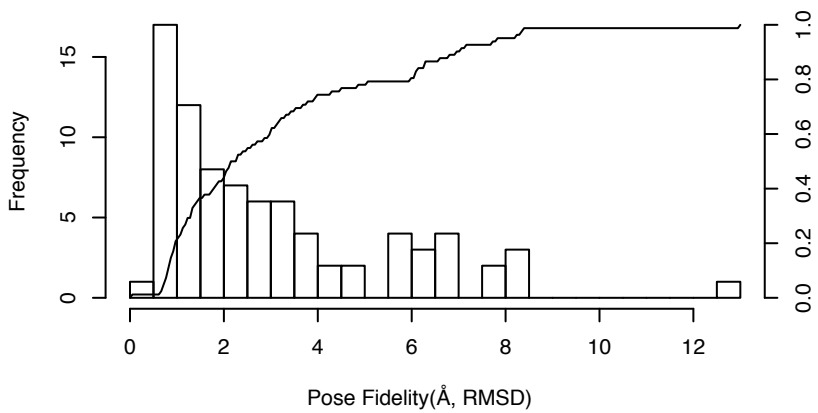**1.B**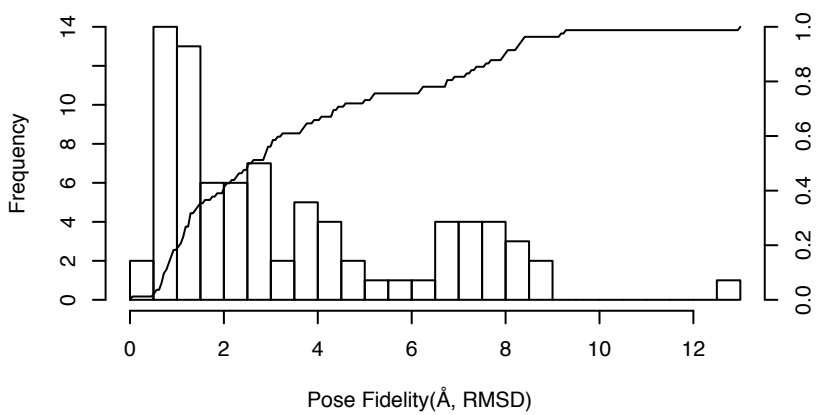**2.A**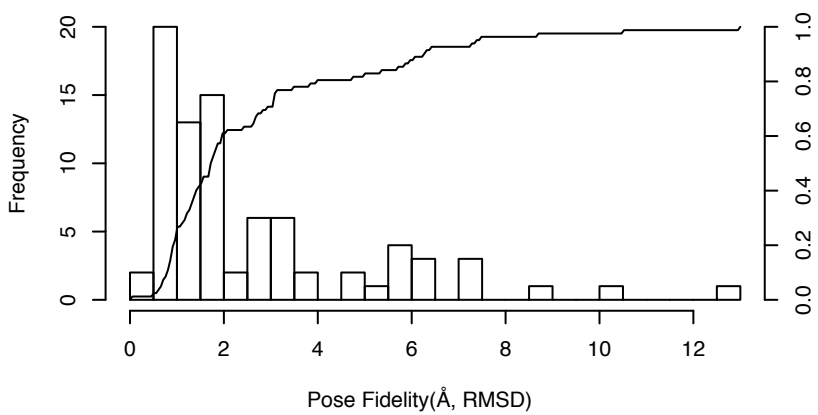**2.B**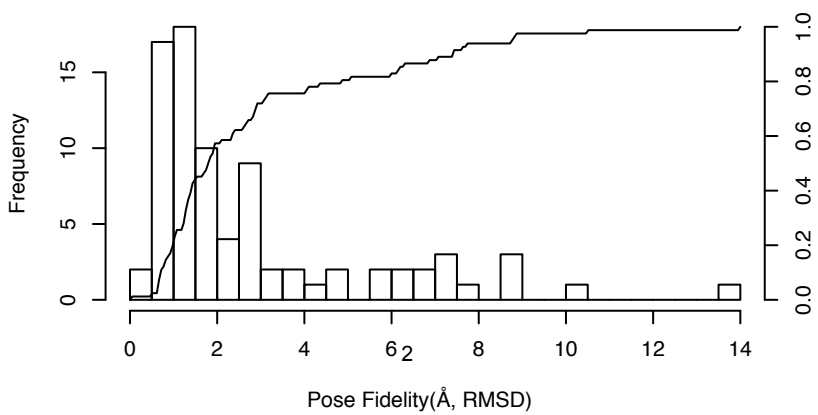

**1.A**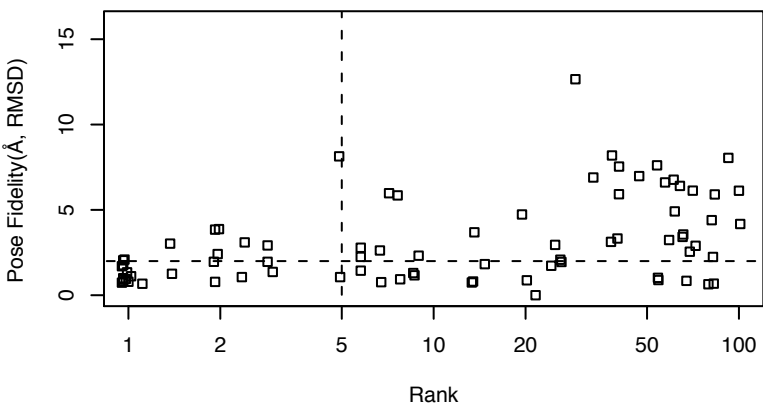**1.B**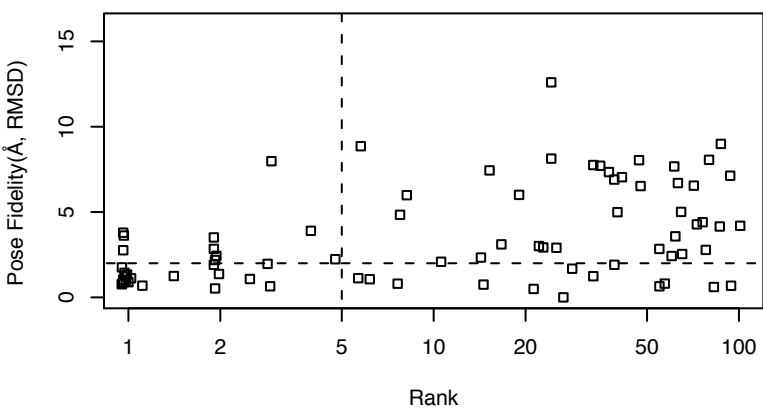**2.A**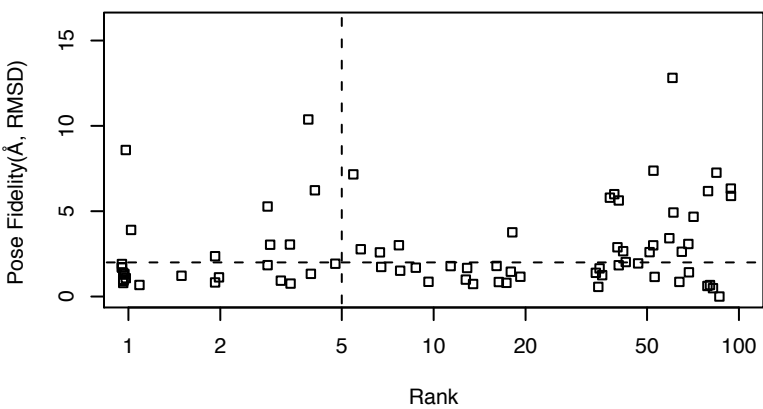**2.B**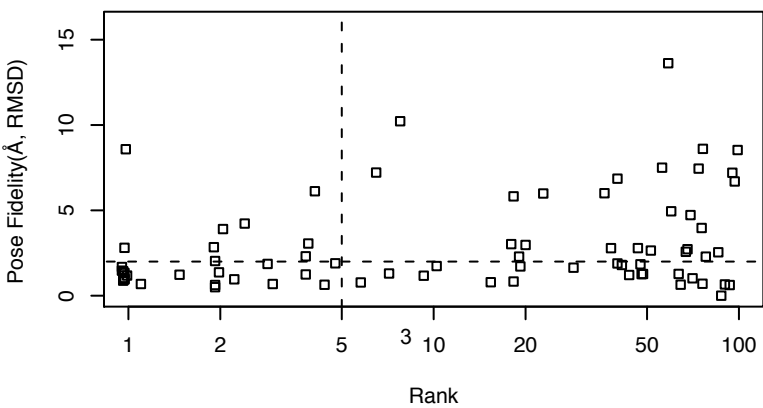

**Table S1.** Processing summary using DOCK Blaster against four benchmarking sets.

|                                      | <b>Astex-85</b> | <b>Gold-114</b> | <b>DUD-38</b> | <b>PDB-9050</b> |
|--------------------------------------|-----------------|-----------------|---------------|-----------------|
| Number of protein targets            | 85              | 114             | 38            | 9,050           |
| Launched OK, PDB code only           | 83              | 75              | 37            | 9,050           |
| Launched OK, when ligand specified   | 1               | 19              | 1             | N/A             |
| Ligand docked and scored             | 83              | 94              | 36            | 7,750           |
| Total elapsed time (h, 400 CPUs max) | 3               | 4               | 20            | 250             |
| Total CPU time (h)                   | 130             | 140             | 130           | 13,000          |

**Table S2.** Number of good poses (<2 Å RMSD) achieved by DOCK Blaster against four benchmarking sets.

| Class | Description              | <b>Astex-85</b> | <b>Gold-114</b> | <b>DUD-38</b> | <b>PDB-9050</b> |
|-------|--------------------------|-----------------|-----------------|---------------|-----------------|
|       | Ligand docked and scored | 82              | 94              | 36            | 7,750           |
| 1     | Good pose achieved       | 51              | 58              | 23            | 3,020           |

**Table S3.** DUD Enrichment, comparison between an expert (the DUD paper) and fully automatic docking with DOCK Blaster.

| <b>Protein Name</b> | <b>PDB code</b> | <b>Expert (DUD paper)</b> |             |              | <b>Automatic (DOCK Blaster)</b> |             |              |
|---------------------|-----------------|---------------------------|-------------|--------------|---------------------------------|-------------|--------------|
|                     |                 | <b>EF1</b>                | <b>EF20</b> | <b>EFmax</b> | <b>EF1</b>                      | <b>EF20</b> | <b>EFmax</b> |
| AR                  | 2ao6            | 33.5                      | 3.8         | 60.2         | 4                               | 1.83        | 35.96        |
| ER-agonist          | 1l2i            | 19.2                      | 4.5         | 29.6         | 7.49                            | 2.01        | 35.97        |
| ER-antagonist       | 3ert            | 12.7                      | 1.3         | 101.6        | 15.34                           | 1.92        | 48.56        |
| GR                  | 1m2z            | 8.9                       | 1.4         | 31.7         | 6.43                            | 1.15        | 36           |
| MR                  | 2aa2            | 46.2                      | 3.7         | 330.0        | 36                              | 3.33        | 36           |
| PPAR $\gamma$       | 1fm9            | 1.0                       | 1.0         | 1.0          | 1.23                            | 0.56        | 2.72         |
| PR                  | 1sr7            | 0.0                       | 2.0         | 2.9          | 3.6                             | 0.74        | 5.14         |
| RXR $\alpha$        | 1mvc            | 24.8                      | 2.2         | 148.5        | 30.86                           | 3.5         | 36           |
| CDK2                | 1ckp            | 13.9                      | 1.4         | 19.8         | N/A                             | N/A         | N/A          |
| EGFr                | 1m17            | 2.1                       | 2.4         | 3.8          | 1.58                            | 1.54        | 1.71         |
| FGFr1               | 1agw            | 0.0                       | 0.2         | 1.0          | 0                               | 1.23        | 1.31         |

|          |      |      |     |       |       |      |       |
|----------|------|------|-----|-------|-------|------|-------|
| HSP90    | 1uy6 | 8.6  | 2.0 | 10.8  | 4.49  | 1.53 | 8.99  |
| P38MAP   | 1kv2 | 2.1  | 2.4 | 4.1   | 0     | 0.63 | 1.19  |
| SRC      | 2src | 1.2  | 1.5 | 3.1   | N/A   | N/A  | N/A   |
| TK       | 1kim | 54.0 | 5.0 | 63.0  | 0     | 2.28 | 2.3   |
| FXa      | 1f0r | 14.6 | 3.8 | 34.9  | 19.19 | 4.04 | 24.11 |
| Thrombin | 3biu | 13.7 | 2.9 | 18.3  | 23.5  | 3.92 | 39.17 |
| Trypsin  | 1bju | 22.5 | 2.6 | 22.5  | 11.31 | 4.55 | 40.73 |
| ACE      | 1o86 | 40.4 | 3.7 | 141.4 | 0     | 1.63 | 1.74  |
| ADA      | 1ndw | 12.9 | 2.4 | 21.5  | 0     | 0.44 | 1.56  |
| COMT     | 1h1d | 0.0  | 3.3 | 11.8  | 0     | 1.37 | 3.92  |
| PDE5     | 1xp0 | 11.8 | 2.3 | 29.1  | 5.96  | 1.3  | 7.6   |
| DHFR     | 3dfr | 21.7 | 3.5 | 28.7  | 53.31 | 4.3  | 70.25 |
| GART     | 1c2t | 42.4 | 3.3 | 70.7  | 30.41 | 4.76 | 35.48 |
| AChE     | 1eve | 1.9  | 2.0 | 3.1   | 0.95  | 2.48 | 2.52  |
| ALR2     | 1ah3 | 38.1 | 2.3 | 76.2  | 13.48 | 2.18 | 35.96 |
| AmpC     | 1xgj | 17.1 | 4.7 | 23.6  | 0     | 1.91 | 2.22  |
| COX-1    | 1q4g | 4.0  | 1.6 | 9.9   | 15.98 | 3.13 | 18.65 |
| COX-2    | 1cx2 | 20.1 | 3.3 | 29.1  | 27.31 | 3.36 | 43.12 |
| GPB      | 1a8i | 22.8 | 4.1 | 28.6  | 0     | 0.87 | 2.25  |
| HIVPR    | 1hpx | 3.7  | 2.2 | 9.3   | 0     | 0.76 | 1.34  |
| HIVRT    | 1rt1 | 5.0  | 3.0 | 49.5  | 5.14  | 1.79 | 38.56 |
| HMGR     | 1hw8 | 33.9 | 2.1 | 198.0 | 11.02 | 2.14 | 23.89 |
| InhA     | 1p44 | 0.0  | 0.3 | 1.0   | 8.31  | 2.29 | 36.81 |
| NA       | 1a4g | 20.2 | 3.3 | 60.6  | 13.96 | 3.37 | 19.94 |
| PARP     | 1efy | 6.0  | 3.6 | 6.3   | 6.18  | 3.78 | 18.53 |
| PNP      | 1b8o | 31.7 | 4.4 | 158.4 | 4.16  | 2.4  | 37.4  |
| SAHH     | 1a7a | 78.0 | 5.0 | 120.0 | 15.98 | 3.13 | 18.65 |

**Table S4.** Compare single ligand metric vs multi ligand metric (DUD, adjusted logAUC). DUD Enrichment results compared with the single ligand metric as a function of parameter set. Showing the agreement between single ligand and multi ligand metrics.

| Protein Name  | PDB code | AdjustedLogAUC |      |      |      | Rank (%) |     |     |     | Pose fidelity (A, RMSD) |       |       |       |
|---------------|----------|----------------|------|------|------|----------|-----|-----|-----|-------------------------|-------|-------|-------|
|               |          | 1A             | 1B   | 2A   | 2B   | 1A       | 1B  | 2A  | 2B  | 1A                      | 1B    | 2A    | 2B    |
| AR            | 2AO6     | 4.3            | 6.2  | 3.9  | 5.8  | 1        | 1   | 1   | 1   | 0.55                    | 0.54  | 0.55  | 0.52  |
| ER-agonist    | 1L2I     | 12.3           | 13.5 | 12.9 | 13.6 | 2        | 1   | 1   | 1   | 0.87                    | 0.88  | 0.85  | 0.87  |
| ER-antagonist | 3ERT     | 15.3           | 13.3 | 16.1 | 16.0 | 1        | 1   | 1   | 1   | 1.51                    | 1.47  | 1.49  | 1.49  |
| GR            | 1M2Z     | 3.2            | 4.1  | 3.1  | 4.1  | 1        | 1   | 1   | 1   | 0.67                    | 0.69  | 0.68  | 0.69  |
| MR            | 2AA2     | 37.8           | 44.2 | 35.1 | 41.8 | 1        | 1   | 1   | 1   | 0.56                    | 0.63  | 0.59  | 0.61  |
| PPARg         | 1FM9     | -0.1           | -0.1 | 0.2  | -0.2 | 29       | 32  | 48  | 47  | 13.77                   | 13.76 | 15.73 | 15.75 |
| PR            | 1SR7     | -2.8           | -0.3 | -2.0 | 0.8  | 4        | 8   | 4   | 4   | 1.06                    | 1.12  | 1.05  | 1.28  |
| RXRa          | 1MVC     | 37.7           | 36.7 | 36.4 | 34.7 | 7        | 6   | 2   | 6   | 1.01                    | 2.09  | 0.86  | 0.97  |
| CDK2          | 1CKP     | N/A            | N/A  | N/A  | N/A  | N/A      | N/A | N/A | N/A | N/A                     | N/A   | N/A   | N/A   |
| EGFr          | 1M17     | 2.9            | 1.3  | 3.6  | 1.9  | 14       | 5   | 64  | 67  | 1.70                    | 4.14  | 8.41  | 7.52  |
| FGFr1         | 1AGW     | 8.7            | 5.8  | 6.9  | 6.1  | 25       | 56  | 28  | 15  | 8.21                    | 9.32  | 7.84  | 7.74  |
| HSP90         | 1UY6     | -1.9           | -1.5 | -1.0 | -0.6 | 17       | 22  | 62  | 38  | 2.65                    | 2.95  | 0.94  | 7.62  |
| TK            | 1KIM     | 3.6            | 4.1  | 2.3  | 3.7  | 62       | 61  | 33  | 26  | 3.79                    | 3.77  | 1.17  | 1.17  |
| FXa           | 1F0R     | 23.9           | 21.3 | 23.9 | 21.3 | 2        | 2   | 2   | 3   | 1.23                    | 7.87  | 1.11  | 8.23  |
| Thrombin      | 3BIU     | 21.3           | 35.3 | 16.9 | 31.0 | 11       | 1   | 10  | 1   | 4.29                    | 4.36  | 4.21  | 4.16  |
| Trypsin       | 1BJU     | 18.6           | 21.8 | 23.2 | 25.0 | 5        | 1   | 1   | 1   | 2.49                    | 2.51  | 1.90  | 2.34  |
| ACE           | 1O86     | 3.1            | 2.1  | 0.2  | 0.9  | 3        | 5   | 4   | 8   | 2.88                    | 2.81  | 2.81  | 2.11  |
| ADA           | 1NDW     | -1.0           | -1.0 | -0.8 | -0.8 | 20       | 20  | 28  | 28  | 2.86                    | 2.86  | 3.44  | 3.44  |
| COMT          | 1H1D     | 5.3            | 4.2  | 7.2  | 5.0  | 84       | 81  | 90  | 82  | 10.01                   | 10.25 | 6.14  | 6.05  |
| PDE5          | 1XP0     | 5.7            | 5.0  | 6.9  | 7.0  | 11       | 16  | 13  | 16  | 7.68                    | 7.56  | 7.62  | 7.59  |
| DHFR          | 3DFR     | 45.4           | 29.4 | 42.6 | 27.1 | 2        | 4   | 5   | 6   | 5.22                    | 5.15  | 5.22  | 5.22  |
| GART          | 1C2T     | 49.1           | 30.4 | 41.0 | 27.3 | 2        | 2   | 1   | 1   | 9.11                    | 9.32  | 9.38  | 9.39  |
| AChE          | 1EVE     | 7.6            | 7.1  | 7.4  | 5.6  | 10       | 15  | 9   | 15  | 1.48                    | 1.44  | 1.94  | 2.04  |
| ALR2          | 1AH3     | 17.2           | 16.7 | 15.4 | 17.0 | 4        | 3   | 6   | 4   | 3.24                    | 1.90  | 3.34  | 1.93  |
| AmpC          | 1XGJ     | 4.9            | 1.5  | 2.6  | -0.8 | 54       | 16  | 57  | 20  | 5.37                    | 6.26  | 5.85  | 5.76  |
| COX-1         | 1Q4G     | 12.8           | 10.6 | 14.2 | 12.7 | 3        | 3   | 3   | 3   | 1.96                    | 1.96  | 1.84  | 1.86  |
| COX-2         | 1CX2     | 27.8           | 19.8 | 26.7 | 18.7 | 2        | 2   | 2   | 2   | 0.86                    | 0.94  | 0.89  | 0.89  |
| GPB           | 1A8I     | 1.6            | -2.2 | 0.4  | -5.0 | 30       | 54  | 33  | 53  | 0.65                    | 0.69  | 0.67  | 0.70  |
| HIVPR         | 1HPX     | -1.8           | -2.2 | -3.8 | -2.9 | 81       | 37  | 74  | 55  | 8.44                    | 8.56  | 14.58 | 14.75 |
| HIVRT         | 1RT1     | 8.0            | 4.2  | 6.4  | 3.7  | 6        | 11  | 8   | 15  | 1.05                    | 1.55  | 1.51  | 1.44  |
| HMGR          | 1HW8     | 13.5           | 10.2 | 10.1 | 8.3  | 1        | 1   | 1   | 1   | 2.56                    | 2.55  | 2.60  | 2.53  |
| InhA          | 1P44     | 10.8           | 9.0  | 12.4 | 9.9  | 1        | 1   | 2   | 1   | 1.30                    | 1.28  | 1.28  | 1.30  |
| NA            | 1A4G     | 29.4           | 29.1 | 29.7 | 27.4 | 43       | 33  | 4   | 3   | 1.35                    | 1.39  | 1.55  | 1.54  |
| PARP          | 1EFY     | 21.6           | 10.4 | 20.9 | 9.8  | 4        | 24  | 3   | 14  | 0.76                    | 3.63  | 2.54  | 6.58  |
| PNP           | 1B8O     | 12.1           | 11.9 | 12.7 | 13.5 | 22       | 39  | 29  | 40  | 2.28                    | 2.28  | 2.36  | 2.31  |
| SAHH          | 1A7A     | 21.5           | 23.0 | 20.9 | 20.3 | 13       | 18  | 17  | 26  | 0.65                    | 0.91  | 0.82  | 0.96  |

**Table S5.** Summary of docking successes, condensing data from tables at <http://data.docking.org/>.

| <b>Outcome</b>                                           | <b>Astex-85</b> | <b>Gold-114</b> | <b>DUD-38</b> | <b>PDB-9050</b> |
|----------------------------------------------------------|-----------------|-----------------|---------------|-----------------|
| Targets attempted                                        | 85              | 114             | 38            | 9,050           |
| Ligand re-docked and scored                              | 82              | 94              | 36            | 7,750           |
| Re-dock within 0-2A, insensitive to parameters           | 29              | 34              | 13            | 1,528           |
| Re-dock within 0-2A, sensitive to parameters             | 22              | 24              | 10            | 1,527           |
| Re-dock within 2-3A                                      | 11              | 17              | 4             | 1,344           |
| Re-dock within 0-2A, <5% rank, insensitive to parameters | 18              | 17              | 8             | 626             |
| Re-dock within 0-2A, <5% rank, sensitive to parameters   | 11              | 10              | 7             | 772             |
| Re-dock within 0-2A, 5-15% rank                          | 9               | 11              | 4             | 576             |
